# Supplementary material for: Privileged structures: synthesis and structural investigations on tricyclic sulfonamides
Source: Royal Society of Chemistry journal article supplement (doi:10.1039/b9nj00279k), 2009-01-01
Supplement: b9nj00279k.pdf [file b9nj00279k.pdf]

### Crystal packing of compounds **4a**, **8b**, **13a**, **14a**, **5b'(Me<sub>2</sub>SO)** and **15a'(Me<sub>2</sub>SO)**.

In compound **4a** a H-bond between N(1)-H(1n) and the oxygen atom O(2) of a symmetry related molecule (see Table S1) gives rise to a chain extending along the  $x$  axis. In the crystal lattice of compound **8b** a sort of trimer is formed due to the hydrogen-bond interactions (weaker<sup>1</sup> than in **4a**) between the H-bond donors N(1) and N(2) and the oxygen atoms of two symmetry related molecules (see Table S1). In addition the hydrogen atom bonded to N(2) further interacts with a symmetry related oxygen atom O(1) ( $x-1, +y, +z$ ) so that a chain is formed by the repetition of the trimer unit along the  $x$  axis (Scheme S1). Finally in compounds **13a** and **14a**, in addition to an intermolecular hydrogen bond interaction involving the hydrogen atom bonded to N(1) and a symmetry related oxygen atom (O(1) and O(3) for **13a** and **14a**, respectively) (see Table S1) a  $\pi$ - $\pi$  interaction between an aromatic ring [C(7)-C(12) and C(1)-C(6) in compounds **13a** and **14a**, respectively] and its symmetry related image (see Table S2) there exists (Scheme S1). Finally, in the crystal lattices of compounds **5b'(Me<sub>2</sub>SO)** and **15a'(Me<sub>2</sub>SO)** the oxygen atom O(1s) of the crystallization Me<sub>2</sub>SO (DMSO) molecule acts as a bidentate acceptor of H-bonds with respect to the hydrogen atoms bound to N(1a) and N(1b) (see Table S1). No additional intermolecular interactions are present in the 3D-arrangement of **5b'(Me<sub>2</sub>SO)**; while in compound **15a'(Me<sub>2</sub>SO)** a dimer is formed due to a  $\pi$ - $\pi$  interaction between the symmetry related aromatic rings A and A' (" $=-x+1, -y+1, -z+1$ ") (Scheme S1 and Table S2).

<sup>1</sup> G. R. Desiraju, T. Steiner, *The weak hydrogen bond*, IUCr Monographs on Crystallography, Oxford Science Publications, 1999.

**Table S1** Intermolecular hydrogen bonds in compounds **4a**, **8b**, **13a**, **14a**, **5b'(Me<sub>2</sub>SO)** and **15a'(Me<sub>2</sub>SO)**

|                               | X-H...Y                          | X...Y (Å) | H...Y (Å) | X-H...Y (°) |
|-------------------------------|----------------------------------|-----------|-----------|-------------|
| <b>4a</b>                     | N(1)-H(1n)...O(2)'               | 2.904(3)  | 1.99(4)   | 166(3)      |
| <b>8b</b>                     | N(2)-H(2n)...O(2)''              | 3.090(4)  | 2.36(4)   | 150(4)      |
|                               | N(1)-H(1n)...O(1)'''             | 3.001(5)  | 2.37(4)   | 158(4)      |
|                               | N(2)-H(2n)...O(1)' <sup>v</sup>  | 3.137(4)  | 2.64(4)   | 121(3)      |
| <b>13a</b>                    | N(1)-H(1n)...O(1) <sup>v</sup>   | 2.920(3)  | 2.22(3)   | 173(3)      |
| <b>14a</b>                    | N(1)-H(1n)...O(3) <sup>v''</sup> | 3.056(7)  | 2.27(6)   | 156(6)      |
| <b>5b'(Me<sub>2</sub>SO)</b>  | N(1a)-H(1na)...O(1s)             | 2.808(5)  | 1.97(5)   | 163(5)      |
|                               | N(1b)-H(1nb)...O(1s)             | 2.815(6)  | 2.03(6)   | 165(5)      |
| <b>15a'(Me<sub>2</sub>SO)</b> | N(1a)...O(1s)*                   | 2.98(1)   |           |             |
|                               | N(1b)...O(1s)*                   | 3.26(1)   |           |             |

' = x-1/2,-y+3/2,+z; '' = -x+1,-y+1,-z+2; ''' = -x+2,-y+2,-z+2; <sup>v</sup> = x-1,+y,+z; <sup>v</sup> = x-1/2,-y+1/2,+z

<sup>v</sup> = -x+2,-y+2,-z+2; \* = in compound **15a'(Me<sub>2</sub>SO)** the hydrogen atoms bonded to N(1a) and (N1b) were not experimentally found.

**Table S2** π-π Interactions in the crystal packing of compounds **13a**, **14a** and **15a'(Me<sub>2</sub>SO)**

|                               |                        | Distance between the centroids of the aromatic rings (Å) |
|-------------------------------|------------------------|----------------------------------------------------------|
| <b>13a</b>                    | C(7)-C(12)/C(7)-C(12)' | 4.052(3)                                                 |
| <b>14a</b>                    | C(1)-C(6)/C(1)-C(6)''  | 3.785(6)                                                 |
| <b>15a'(Me<sub>2</sub>SO)</b> | C1b-C6b/C1b-C6b''      | 3.66(1)                                                  |

' = -x, -y, -z+1; '' = -x+1, -y+1, -z+1.

Table S3 Most relevant geometrical parameters (distances (Å), angles (°)) as derived from ab-initio geometry optimizations (HF/6-311+G(d,p) level of theory) of the **4a-I**, **4a-II**, **4a-III** modelled species.<sup>a</sup> Those derived from X-ray diffraction data of **4a** have been also reported for comparative purposes.

|                                              | <b>4-I</b> | <b>4-II</b> | <b>4-III</b> | <b>4</b>         |
|----------------------------------------------|------------|-------------|--------------|------------------|
| $r_{\text{N1-S1}}/\text{Å}$                  | 1.635      | 1.635       | 1.633        | 1.616(3)         |
| $r_{\text{S1-O1}}^b/\text{Å}$                | 1.423      | 1.423       | 1.422        | 1.426(2)         |
| $r_{\text{S1-O2}}/\text{Å}$                  | 1.415      | 1.415       | 1.419        | 1.434(2)         |
| $r_{\text{N1-H}}/\text{Å}$                   | 0.997      | 0.997       | 1.000        | 0.94(4)          |
| $r_{\text{S1-C1}}/\text{Å}$                  | 1.766      | 1.776       | 1.783        | 1.754(3)         |
| $r_{\text{N1-C7}}/\text{Å}$                  | 1.417      | 1.417       | 1.425        | 1.420(4)         |
| $\Sigma(\langle \text{N1} \rangle)^c/^\circ$ | 354.4      | 354.4       | 345.7        | 359(2)           |
| $\tau_1^d/^\circ$                            | -58.9      | -59.0       | -55.8        | -62.1(3)         |
| $\tau_2^e/^\circ$                            | -121.5     | -121.5      | -178.8       | -122.1(3)        |
| $\tau_3^f/^\circ$                            | 12.5/59.9  | 12.6/59.9   | 55.7/2.3     | 16.3(1)/ 58.1(1) |
| $\Sigma(\text{internal})^g/^\circ$           | 839.4      | 839.4       | 832.8        | 839.4(2)         |
| $\langle (A/B) \rangle^h/^\circ$             | 48.9       | 48.9        | 54.5         | 45.5(1)          |
| $\Delta C_s^i/^\circ$                        | 42.0       | 42.0        | 46.3         | 50.0             |
| Bow <sup>i</sup> /°                          | 54.5       | 54.5        | 55.2         | 50.6(3)          |
| Stern <sup>i</sup> /°                        | 30.7       | 30.7        | 25.1         | 40.4(1)          |

<sup>a</sup> Refer to Figure 3 in the manuscript for molecular models and atom labelling; <sup>b</sup> O1 is the sulfone oxygen atom closest to the N-bound hydrogen; <sup>c</sup> Summation of the bond angles about the sulfonamide nitrogen atom N1; <sup>d</sup> [C7–N1–S1–C1 Dihedral angle; <sup>e</sup> C6–C1–S1–N1 Dihedral angle; <sup>f</sup> Angles between the plane through N1,S1,Y and the least-squares planes through rings A and B, respectively; <sup>g</sup> Sum of the internal bond angles in the seven-membered ring, which should be about 808° on the basis of the VSEPR rule. <sup>h</sup> Interplanar angle between the aromatic rings. <sup>i</sup> See refs. 23 and 24 in the manuscript for the parameter definitions.

Table S4 Most relevant geometrical parameters (distances (Å), angles (°)) as derived from ab-initio geometry optimizations (HF/6-311+G(d,p) level of theory) of the **8a-I**, **8a-II**, **8a-III** modelled species.<sup>a</sup> Those derived from X-ray diffraction data of **8b** have been also reported for comparative purposes.

|                                                   | <b>8a-I</b> | <b>8a-II</b> | <b>8a-III</b> | <b>8b</b>         |
|---------------------------------------------------|-------------|--------------|---------------|-------------------|
| $r_{\text{N1-S1}}/\overset{\circ}{\text{Å}}$      | 1.630       | 1.643        | 1.630         | 1.596(4)          |
| $r_{\text{S1-O1}}^b/\overset{\circ}{\text{Å}}$    | 1.423       | 1.424        | 1.423         | 1.435(3)          |
| $r_{\text{S1-O2}}/\overset{\circ}{\text{Å}}$      | 1.420       | 1.423        | 1.420         | 1.426(3)          |
| $r_{\text{N1-H}}/\overset{\circ}{\text{Å}}$       | 1.000       | 0.998        | 1.000         | 0.67(4)           |
| $r_{\text{S1-C1}}/\overset{\circ}{\text{Å}}$      | 1.779       | 1.761        | 1.779         | 1.750(4)          |
| $r_{\text{N1-C7}}/\overset{\circ}{\text{Å}}$      | 1.426       | 1.461        | 1.426         | 1.412(5)          |
| $\Sigma(\langle \text{N1} \rangle)^c/^\circ$      | 347.0       | 347.0        | 346.6         | 359(3)            |
| $\tau_1^d/^\circ$                                 | -65.0       | -84.0        | -64.8         | -81.3(3)          |
| $\tau_2^e/^\circ$                                 | -168.1      | -145.5       | -168.3        | -132.0(3)         |
| $\tau_3^f/^\circ$                                 | 55.3/13.8   | 54.3/38.6    | 55.3/13.6     | 39.0(1) / 49.1(2) |
| $\Sigma(\text{internal}\langle \rangle)^g/^\circ$ | 841.7       | 847.7        | 842.6         | 857.6(3)          |
| $\langle (A/B) \rangle^h/^\circ$                  | 44.1        | 28.6         | 44.3          | 21.5(1)           |
| $\Delta C_s^i/^\circ$                             | 53.6        | 68.0         | 53.4          | 65.7              |
| $\text{Bow}^i/^\circ$                             | 45.9        | 23.5         | 46.1          | 9.7(4)            |
| $\text{Stern}^i/^\circ$                           | 19.6        | 9.1          | 19.8          | 28.7(2)           |

<sup>a</sup> Refer to Figure 3 in the manuscript for molecular models and atom labelling; <sup>b</sup> O1 is the sulfone oxygen atom closest to the N-bound hydrogen; <sup>c</sup> Summation of the bond angles about the sulfonamide nitrogen atom N1; <sup>d</sup> [C7–N1–S1–C1 Dihedral angle; <sup>e</sup> C6–C1–S1–N1 Dihedral angle; <sup>f</sup> Angles between the plane through N1,S1,Y and the least-squares planes through rings A and B, respectively; <sup>g</sup> Sum of the internal bond angles in the seven-membered ring, which should be about 808° on the basis of the VSEPR rule. <sup>h</sup> Interplanar angle between the aromatic rings. <sup>i</sup> See refs. 23 and 24 in the manuscript for the parameter definitions.

Table S5 Most relevant geometrical parameters (distances (Å), angles (°)) as derived from ab-initio geometry optimizations (HF/6-311+G(d,p) level of theory) of the **13a-I**, **13a-II**, **13a-III** modelled species.<sup>a</sup> Those derived from X-ray diffraction data of **13a** have been also reported for comparative purposes.

|                                                  | <b>13a-I</b> | <b>13a-II</b> | <b>13a-III</b> | <b>13a</b>      |
|--------------------------------------------------|--------------|---------------|----------------|-----------------|
| $r_{\text{N1-S1}}/\overset{\circ}{\text{Å}}$     | 1.634        | 1.634         | 1.632          | 1.610(3)        |
| $r_{\text{S1-O1}}^b/\overset{\circ}{\text{Å}}$   | 1.424        | 1.424         | 1.422          | 1.432(2)        |
| $r_{\text{S1-O2}}/\overset{\circ}{\text{Å}}$     | 1.415        | 1.415         | 1.420          | 1.428(2)        |
| $r_{\text{N1-H}}/\overset{\circ}{\text{Å}}$      | 0.995        | 0.995         | 1.000          | 0.70(3)         |
| $r_{\text{S1-C1}}/\overset{\circ}{\text{Å}}$     | 1.773        | 1.773         | 1.792          | 1.769(2)        |
| $r_{\text{N1-C7}}/\overset{\circ}{\text{Å}}$     | 1.408        | 1.408         | 1.425          | 1.434(4)        |
| $\Sigma(\langle \text{N1} \rangle)^c/\circ$      | 359.3        | 359.4         | 346.0          | 346(2)          |
| $\tau_1^d/\circ$                                 | -74.6        | -74.1         | -53.6          | -69.4(2)        |
| $\tau_2^e/\circ$                                 | -117.0       | -116.9        | 167.7          | -173.0(2)       |
| $\tau_3^f/\circ$                                 | 18.4/65.0    | 17.9/65.0     | 56.9/11.7      | 58.7(1)/ 7.4(1) |
| $\Sigma(\text{internal}\langle \rangle)^g/\circ$ | 837.5        | 837.5         | 822.8          | 832.1(2)        |
| $\langle (\text{A/B})^h/\circ$                   | 47.9         | 48.3          | 68.2           | 51.6(1)         |
| $\Delta C_s^i/\circ$                             | 59.3         | 59.0          | 43.7           | 50.6            |
| $\text{Bow}^i/\circ$                             | 42.5         | 42.7          | 49.2           | 43.2(1)         |
| $\text{Stern}^i/\circ$                           | 31.9         | 32.1          | 33.5           | 12.1(1)         |

<sup>a</sup> Refer to Figure 3 in the manuscript for molecular models and atom labelling; <sup>b</sup> O1 is the sulfone oxygen atom closest to the N-bound hydrogen; <sup>c</sup> Summation of the bond angles about the sulfonamide nitrogen atom N1; <sup>d</sup> [C7–N1–S1–C1 Dihedral angle; <sup>e</sup> C6–C1–S1–N1 Dihedral angle; <sup>f</sup> Angles between the plane through N1,S1,Y and the least-squares planes through rings A and B, respectively; <sup>g</sup> Sum of the internal bond angles in the seven-membered ring, which should be about 808° on the basis of the VSEPR rule. <sup>h</sup> Interplanar angle between the aromatic rings. <sup>i</sup> See refs. 23 and 24 in the manuscript for the parameter definitions.

Table S6 Most relevant geometrical parameters (distances (Å), angles (°)) as derived from ab-initio geometry optimizations (HF/6-311+G(d,p) level of theory) of the **14a-I**, **14a-II**, **14a-III** modelled species.<sup>a</sup> Those derived from X-ray diffraction data of **14a** have been also reported for comparative purposes.

|                                                   | <b>14a-I</b> | <b>14a-II</b> | <b>14a-III</b> | <b>14a</b>      |
|---------------------------------------------------|--------------|---------------|----------------|-----------------|
| $r_{\text{N1-S1}}/\overset{\circ}{\text{Å}}$      | 1.638        | 1.638         | 1.627          | 1.594(7)        |
| $r_{\text{S1-O1}}^b/\overset{\circ}{\text{Å}}$    | 1.421        | 1.420         | 1.417          | 1.424(4)        |
| $r_{\text{S1-O2}}/\overset{\circ}{\text{Å}}$      | 1.412        | 1.412         | 1.419          | 1.446(6)        |
| $r_{\text{N1-H}}/\overset{\circ}{\text{Å}}$       | 0.996        | 0.996         | 1.001          | 0.84(7)         |
| $r_{\text{S1-C1}}/\overset{\circ}{\text{Å}}$      | 1.774        | 1.774         | 1.798          | 1.773(8)        |
| $r_{\text{N1-C7}}/\overset{\circ}{\text{Å}}$      | 1.406        | 1.406         | 1.426          | 1.463(9)        |
| $\Sigma(\langle \text{N1} \rangle)^c/^\circ$      | 355.2        | 355.2         | 347.5          | 348(2)          |
| $\tau_1^d/^\circ$                                 | -86.6        | -86.7         | -60.7          | -62.9(6)        |
| $\tau_2^e/^\circ$                                 | -120.4       | -120.5        | 174.8          | 178.0(5)        |
| $\tau_3^f/^\circ$                                 | 31.5/65.5    | 31.6/65.5     | 25.8/38.4      | 59.1(3)/ 2.9(2) |
| $\Sigma(\text{internal}\langle \rangle)^g/^\circ$ | 840.1        | 840.0         | 825.8          | 827.7(3)        |
| $\langle (A/B) \rangle^h/^\circ$                  | 39.9         | 39.8          | 64.1           | 60.5(2)         |
| $\Delta C_s^i/^\circ$                             | 45.6         | 45.6          | 50.3           | 53.4            |
| $\text{Bow}^i/^\circ$                             | 32.3         | 32.2          | 48.8           | 45.8(3)         |
| $\text{Stern}^i/^\circ$                           | 27.4         | 27.4          | 28.4           | 20.4(4)         |

<sup>a</sup> Refer to Figure 3 in the manuscript for molecular models and atom labelling; <sup>b</sup> O1 is the sulfone oxygen atom closest to the N-bound hydrogen; <sup>c</sup> Summation of the bond angles about the sulfonamide nitrogen atom N1; <sup>d</sup> [C7–N1–S1–C1 Dihedral angle; <sup>e</sup> C6–C1–S1–N1 Dihedral angle; <sup>f</sup> Angles between the plane through N1,S1,Y and the least-squares planes through rings A and B, respectively; <sup>g</sup> Sum of the internal bond angles in the seven-membered ring, which should be about 808° on the basis of the VSEPR rule. <sup>h</sup> Interplanar angle between the aromatic rings. <sup>i</sup> See refs. 23 and 24 in the manuscript for the parameter definitions.

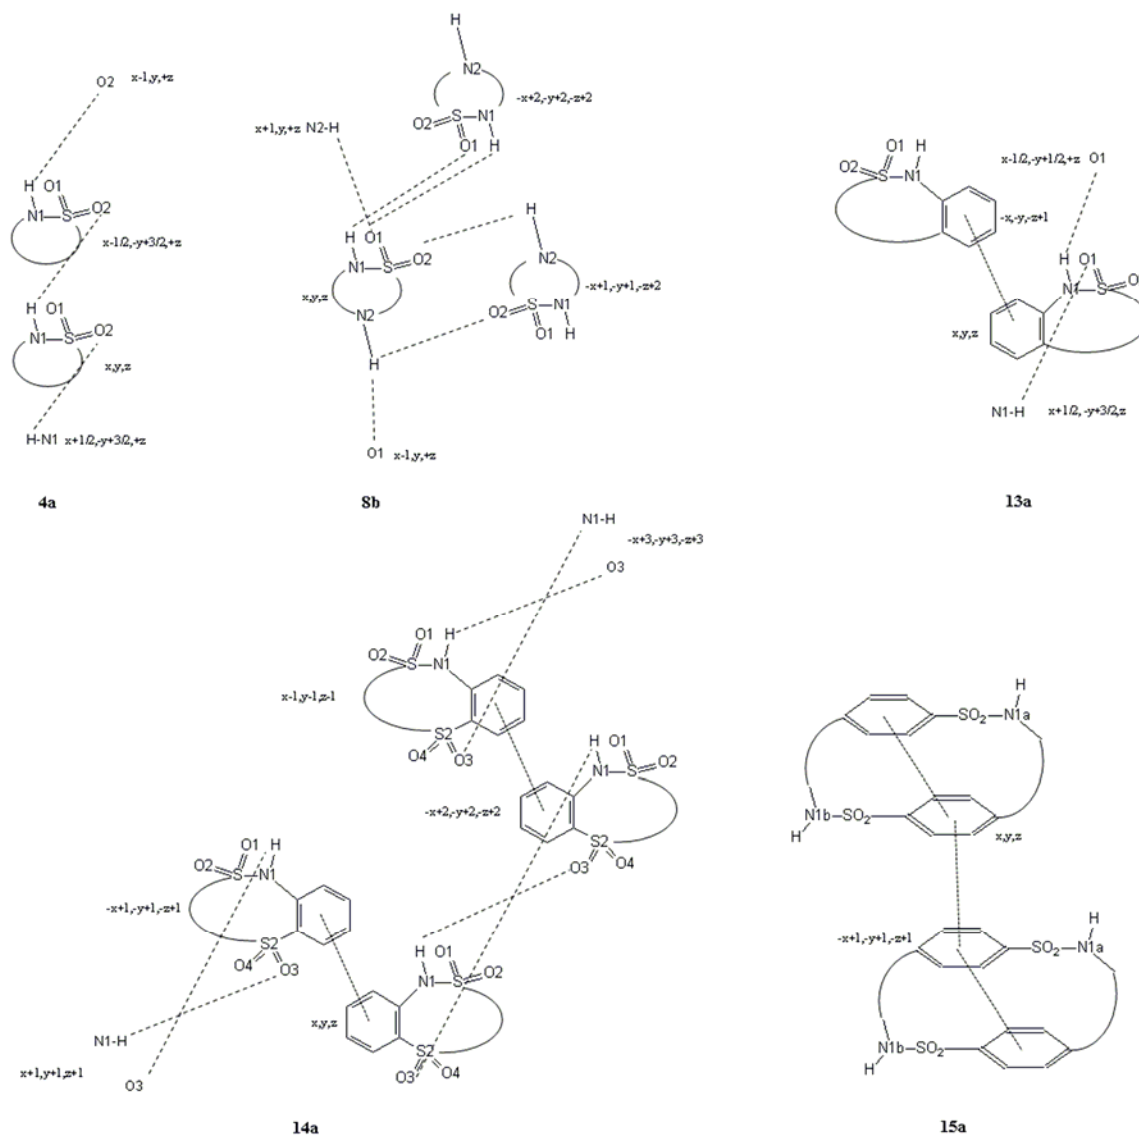

**Scheme S1** Schematic representation of the intermolecular interactions in **4a**, **8b**, **13a**, **14a** and **15a**(Me<sub>2</sub>SO)
